# Supplementary material for: Clinical features and outcomes of patients with antineutrophil cytoplasmic antibody-positive systemic lupus erythematosus
Source: PubMed Central journal article supplement — Ren Fail. 2023 Jul 20;45(1):2235431. doi: 10.1080/0886022X.2023.2235431 (PMC10360989; doi:10.1080/0886022x.2023.2235431), 2023-07-20
Supplement: IRNF_A_2235431_SM3000.pdf [file IRNF_A_2235431_SM3000.pdf]

## Supplementary Material

Supplementary Table S1. Comparison of clinical characteristics between the ANCA-positive LN group and ANCA-positive non-LN group

|                                                          | ANCA -positive LN<br>N=25 | ANCA -positive non-LN<br>N=21 | <i>P</i> |
|----------------------------------------------------------|---------------------------|-------------------------------|----------|
| Age (years)                                              | 45.73 ± 14.17             | 41.52 ± 13.97                 | 0.314    |
| Male, n (%)                                              | 1 (3.8)                   | 1 (4.0)                       | 0.699*   |
| Time-gap from diagnosis of SLE to ANCA positive (months) | 15.00 (5.50, 96.00)       | 12.00 (1.00, 30.00)           | 0.177    |
| WBC (*10 <sup>9</sup> /L)                                | 3.97 (2.76, 5.55)         | 4.25 (2.75, 5.99)             | 0.850    |
| HGB (g/L)                                                | 91.54 ± 22.70             | 100.95 ± 14.57                | 0.118    |
| Serum albumin (g/L)                                      | 36.21 ± 13.03             | 39.21 ± 9.74                  | 0.098    |
| CRP (mg/L)                                               | 3.00 (3.00, 19.15)        | 9.90 (9.90, 18.18)            | 0.810    |
| ESR (mm/h)                                               | 60.25 ± 36.88             | 53.35 ± 32.80                 | 0.601    |
| CREA (umol/L)                                            | 107.95 (49.75, 298.25)    | 43.00 (37.51, 53.00)          | 0.001    |
| eGFR (mL/min/1.73m <sup>2</sup> )                        | 54.48 (14.81, 114.15)     | 123.42 (107.44, 137.16)       | 0.001    |
| 24h urine protein (g)                                    | 1.36 (0.66, 3.39)         | 0.10 (0.05, 0.25)             | 0.000    |
| IgG, g/L                                                 | 18.42 ± 9.79              | 23.14 ± 10.19                 | 0.118    |
| IgM, g/L                                                 | 0.85 (0.44, 1.47)         | 1.39 (1.10, 1.91)             | 0.007    |
| IgA, g/L                                                 | 2.99 ± 1.36               | 3.35 ± 1.59                   | 0.416    |
| C3, g/L                                                  | 0.54 ± 0.27               | 0.75 ± 0.26                   | 0.011    |
| C4, g/L                                                  | 0.14 ± 0.09               | 0.13 ± 0.07                   | 0.946    |
| Anti-dsDNA, n (%)                                        | 12 (50.0)                 | 9 (60.0)                      | 0.542    |
| Anti-dsDNA titer (IU/mL)                                 | 6.63 (2.29, 100.00)       | 1.79 (0.98, 16.41)            | 0.185    |
| Anti-SmD1, n (%)                                         | 11 (47.8)                 | 9 (60.0)                      | 0.469    |
| Anti-ANA, n (%)                                          | 15 (57.7)                 | 14 (66.7)                     | 0.529    |
| Anti-RNP, n (%)                                          | 4 (28.6)                  | 10 (66.7)                     | 0.040    |
| Anti-MPO, n (%)                                          | 11 (44.0)                 | 5 (23.8)                      | 0.152    |
| Anti-PR3, n (%)                                          | 14 (56.0)                 | 16 (76.2)                     | 0.152    |
| Anti-MPO titer (RU/mL)                                   | 73.63 (63.84, 105.82)     | 39.90 (24.71, 122.30)         | 0.117    |
| Anti-PR3 titer (RU/mL)                                   | 55.20 (31.86, 72.55)      | 71.94 (35.90, 131.42)         | 0.188    |

\*Fisher test; WBC: white blood cell; HGB: hemoglobin; CRP: C-reactive protein; ESR: erythrocyte sedimentation rate; CREA: serum creatinine; eGFR: estimated glomerular filtration rate; IgG: serum immunoglobulin G, Normal values: 7-16g/L; IgA: serum immunoglobulin A, Normal values:0.7-3.8g/L; C3: complement 3, Normal values: 0.8-1.85g/L; C4: complement 4; Normal values: 0.1-0.4 g/L; ds-DNA: double stranded DNA antibodies; Normal values:0-7IU/ml; SmD1: Smith antigen D1; ANA: antinuclear antibody; MPO: myeloperoxidase; PR3: proteinase 3; Anti-MPO titer: Normal values:< 20 RU/ml; Anti-PR3 titer: Normal values:< 20 RU/ml;

Supplementary Table S2. Immune complex deposition in ANCA positive LN and ANCA negative LN

| Direct immunofluorescence microscopy | ANCA positive LN | ANCA negative LN | <i>P</i> |
|--------------------------------------|------------------|------------------|----------|
| IgG                                  | 1.5 (0, 2)       | 3 (2, 3)         | 0.013    |
| IgM                                  | 2 (1, 2)         | 2 (1, 2)         | 0.717    |
| IgA                                  | 2 (1, 2)         | 2 (1, 2)         | 0.627    |
| C3                                   | 3 (2, 3)         | 2.5 (2, 3)       | 0.676    |
| C1q                                  | 2 (1, 3)         | 2 (2, 3)         | 0.648    |

- Follow-up of ANCA titers, anti-dsDNA titers, CREA in ANCA positive SLE

The change in ANCA titers during treatment in ANCA positive SLE was monitored, and the anti-MPO and anti-PR3 titers in most of the patients decreased to within normal range (20 RU/mL) within six months (Supplementary Figure S1a, S1e). In one patient, high MPO titers recurred one year after self-discontinuation of treatment (Figure S1a). The anti-ds-DNA titers and serum CREA level were also collected during the same period (Supplementary Figure S1b, S1c, S1f, S1g).

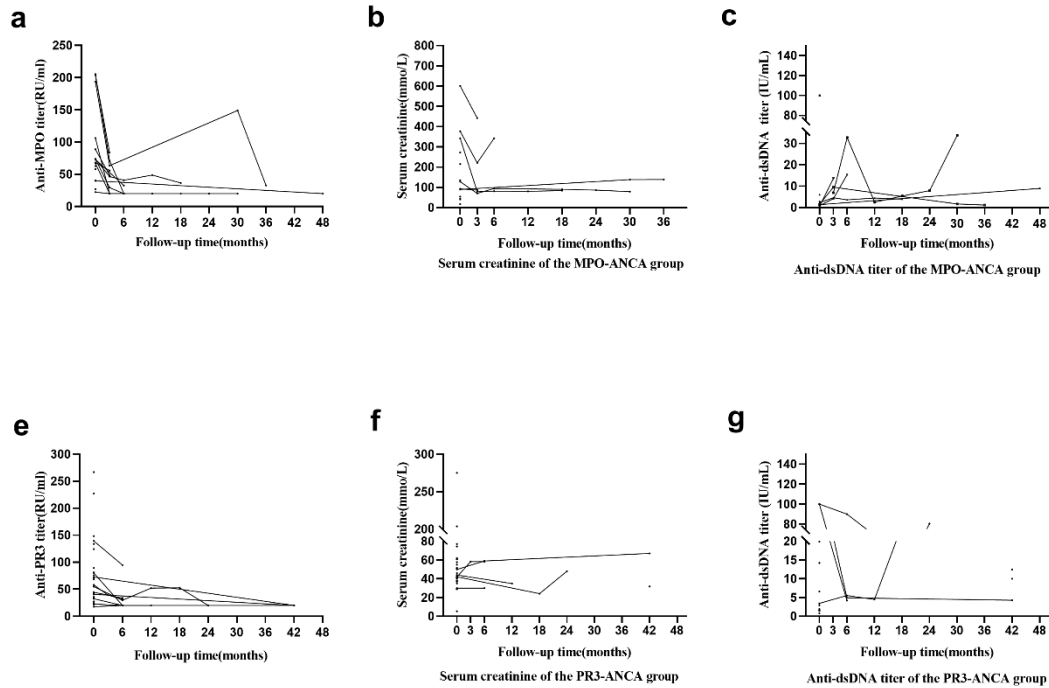

Supplementary Figure S1. Changes in the CREA level and ANCA and anti-dsDNA titers during follow-up (a) changes of anti-MPO titers in SLE with ANCA-positive patients. (b) changes of CREA in MPO-ANCA group. (c) changes of anti-dsDNA titers in MPO-ANCA group. (e) changes of anti-PR3 titers in SLE with ANCA-positive patients. (f) changes of CREA in PR3-ANCA group. (g) changes of anti-dsDNA titers in PR3-ANCA group.

- ANCA serology and correlation of ANCA titers and clinical characteristics

Anti-MPO titers were positively correlated with levels of complement C3 and C4. Anti-PR3 titers positively correlated with levels of complement C4. However, there was no correlation between the ANCA titers and antibody seropositivity in the ANCA-

positive group. Meanwhile, ds-DNA titers were positively correlated with antibody seropositivity in the ANCA-positive group (Supplementary Figure S2).

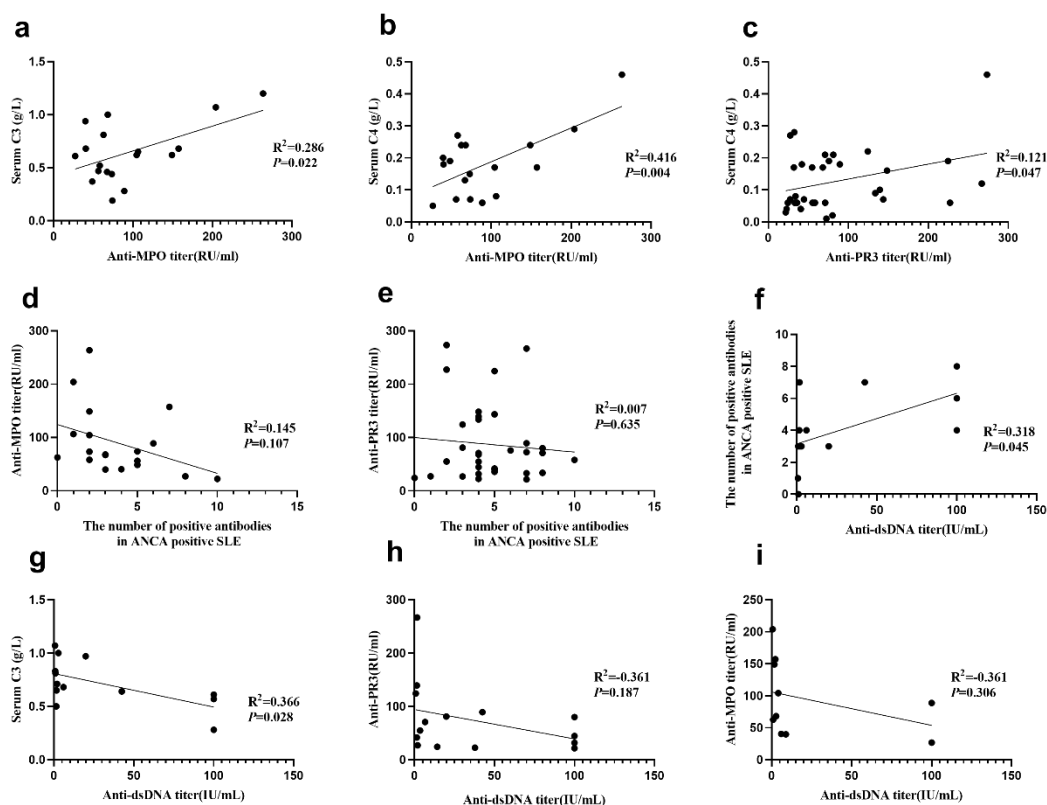

Supplementary Figure S2. Correlation of ANCA titers and clinical characteristics. (a) the correlation of anti-MPO titers with serum C3. (b) the correlation of anti-MPO titers with serum C4. (c) the correlation of anti-PR3 titers with serum C4. (d) the correlation of positive antibodies numbers in SLE with anti-MPO titers. (e) the correlation of positive antibodies numbers in SLE with anti-PR3 titers. (f) the correlation of positive antibodies numbers in ANCA positive SLE group with anti-dsDNA titers. (g) the correlation of anti-dsDNA titers with serum C3. (h) the correlation of anti-dsDNA titers with anti-MPO titers. (i) the correlation of anti-dsDNA titers with anti-PR3 titers.
